# Supplementary material for: The cluster randomized crossover trial: The effects of attrition in the AB/BA design and how to account for it in sample size calculations
Source: PubMed Central journal article supplement — Clin Trials. 2020 Mar 19;17(4):420–9. doi: 10.1177/1740774520913042 (PMC7472836; doi:10.1177/1740774520913042), 2020-03-19
Supplement: Supplementary_File_1.pdf [file Supplementary_File_1.pdf]

## Derivation of $var(\hat{\gamma}_2)$ for the cohort design without attrition.

Supplement to *The cluster randomized crossover trial: the effects of attrition in the AB/BA design and how to account for it in sample size calculations.*

The variance of the mean outcome within cluster  $j$  in time period  $h = 1$  is given by

$$var(\bar{y}_{1,j}) = \frac{m var(y_{1ij})}{m^2} + \frac{m(m-1)cov(y_{1ij}, y_{1i'j})}{m^2} = \frac{\tilde{\sigma}_C^2 + \tilde{\sigma}_{CP}^2 + \tilde{\sigma}_I^2 + \tilde{\sigma}_M^2}{m} + \frac{(m-1)(\tilde{\sigma}_C^2 + \tilde{\sigma}_{CP}^2)}{m}.$$

The same formula holds for  $var(\bar{y}_{2,j})$ .

The covariance of these two cluster-period means within cluster  $j$  is equal to

$$cov(\bar{y}_{1,j}, \bar{y}_{2,j}) = \frac{m cov(y_{1ij}, y_{2ij})}{m^2} + \frac{m(m-1) cov(y_{1ij}, y_{2i'j})}{m^2} = \frac{(\tilde{\sigma}_C^2 + \tilde{\sigma}_I^2)}{m} + \frac{(m-1)\tilde{\sigma}_C^2}{m}.$$

The difference in cluster-period means in cluster  $j$  has variance

$$\begin{aligned} var(\bar{y}_{1,j} - \bar{y}_{2,j}) &= var(\bar{y}_{1,j}) + var(\bar{y}_{2,j}) - 2cov(\bar{y}_{1,j}, \bar{y}_{2,j}) = \\ &2 \frac{\tilde{\sigma}_C^2 + \tilde{\sigma}_{CP}^2 + \tilde{\sigma}_I^2 + \tilde{\sigma}_M^2}{m} + 2 \frac{(m-1)(\tilde{\sigma}_C^2 + \tilde{\sigma}_{CP}^2)}{m} - 2 \frac{(\tilde{\sigma}_C^2 + \tilde{\sigma}_I^2)}{m} - 2 \frac{(m-1)\tilde{\sigma}_C^2}{m} \\ &= \frac{2}{m} (\tilde{\sigma}_C^2 + \tilde{\sigma}_{CP}^2 + \tilde{\sigma}_I^2 + \tilde{\sigma}_M^2 + (m-1)(\tilde{\sigma}_C^2 + \tilde{\sigma}_{CP}^2) - (\tilde{\sigma}_C^2 + \tilde{\sigma}_I^2) - (m-1)\tilde{\sigma}_C^2) \\ &= \frac{2}{m} (\tilde{\sigma}_M^2 + m\tilde{\sigma}_{CP}^2). \end{aligned}$$

The treatment effect  $\gamma_1$  is then estimated by taking the mean of the difference in means across all  $k$  clusters. This estimator has variance:

$$var(\hat{\gamma}_2) = \frac{2}{mk} (\tilde{\sigma}_M^2 + m\tilde{\sigma}_{CP}^2).$$

This variance can be reformulated in terms of correlations by making the following substitutions:

$$\tilde{\sigma}_{CP}^2 = \sigma_T^2(\rho - \eta)$$

$$\tilde{\sigma}_M^2 = \sigma_T^2 - \tilde{\sigma}_C^2 - \tilde{\sigma}_{CP}^2 - \tilde{\sigma}_I^2 = \sigma_T^2(1 - \eta - (\rho - \eta) - (\xi - \eta)) = \sigma_T^2(1 - \rho - \xi + \eta).$$

It then follows

$$\text{var}(\hat{\gamma}_2) = \frac{2\sigma_T^2(1 - \xi + (m - 1)(\rho - \eta))}{mk}.$$
