# Supplementary material for: The cluster randomized crossover trial: The effects of attrition in the AB/BA design and how to account for it in sample size calculations
Source: PubMed Central journal article supplement — Clin Trials. 2020 Mar 19;17(4):420–9. doi: 10.1177/1740774520913042 (PMC7472836; doi:10.1177/1740774520913042), 2020-03-19
Supplement: Supplementary_File_2.pdf [file Supplementary_File_2.pdf]

# The cluster randomized crossover trial: the effects of attrition in the AB/BA design and how to account for it in sample size calculations.

## R script for lavender scent example

```

alpha=0.05
ES=0.16

eta=0.005
rho=0.01
xi=0.3
#####
### individual randomized trial - parallel group design
#####
n=seq(2,1300,by=1)
var=4/n
power=pnorm(ES/sqrt(var)-qnorm(1-alpha/2))
plot(n,power,ylim=c(0,1),type="l")
cbind(n,power)

#####
### cluster randomized trial - parallel group design
#####
m=seq(2,200,by=1)
k=20
var=4*(1-rho+m*rho)/(m*k)
power=pnorm(ES/sqrt(var)-qnorm(1-alpha/2))
plot(m,power,ylim=c(0,1),type="l")
cbind(m,power)

#####
### cluster randomized trial - crossover design
### cross-sectional - no dropout
#####
m=seq(2,50,by=1)
var=2*(1+(m-1)*rho-m*eta)/(m*k)

```

```

power=pnorm(ES/sqrt(var)-qnorm(1-alpha/2))
plot(m,power,ylim=c(0,1),type="l")
cbind(m,power)

#####
### cluster randomized trial - crossover design
### cohort - no dropout
#####
m=seq(2,50,by=1)
var=2*(1-xi+(m-1)*(rho-eta))/(m*k)
power=pnorm(ES/sqrt(var)-qnorm(1-alpha/2))
plot(m,power,ylim=c(0,1),type="l")
cbind(m,power)

#####
### cluster randomized trial - crossover design
### cohort - 20% dropout
#####
p=0.25 # proportion attrition in second time period in each
cluster
m.vec=seq(10,80,by=1)
var=rep(0,71)
for(ii in 1:71)
  {
    m=m.vec[ii]
    n=m*p-1

    diag.mat=matrix(rho,m,m)
    diag(diag.mat)=1
    offdiag.mat=matrix(eta,m,m)
    diag(offdiag.mat)=xi

    VV.upper=cbind(diag.mat,offdiag.mat)
    VV.lower=cbind(offdiag.mat,diag.mat)
    VV=rbind(VV.upper,VV.lower)
    VV=VV[-((2*m-n):(2*m)),-((2*m-n):(2*m)) ]

    XXab=matrix(0,2*m,3)
    XXab[,1]=1
    XXab[(m+1):(2*m),2:3]=1
    XXab=XXab[-((2*m-n):(2*m)),]

    XXba=matrix(0,2*m,3)
    XXba[,1]=1
    XXba[1:m,3]=1
    XXba[(m+1):(2*m),2]=1
    XXba=XXba[-((2*m-n):(2*m)),]
  }

```

```

XVXab=t (XXab) %*%solve (VV) %*%XXab
XVXba=t (XXba) %*%solve (VV) %*%XXba

var.beta=solve (0.5*k* (XVXab+XVXba) )
var[ii]=var.beta[3,3]
}
power=pnorm (ES/sqrt (var) -qnorm (1-alpha/2) )
plot (m.vec,power,ylim=c (0,1) ,type="l" )
cbind (m.vec,power)

#####
### cluster randomized trial - crossover design- cohort
### 20% dropout - replacement of subjects who drop out by others
#####
m.vec=seq (10,80,by=1)
var=rep (0,71)
for (ii in 1:71)
{
m=m.vec[ii]
n=m*p-1

diag.mat=matrix (rho,m,m)
diag (diag.mat)=1
offdiag.mat=matrix (eta,m,m)
diag (offdiag.mat)=xi
offdiag.mat [ (m-n) :m, (m-n) : (m) ]=eta

VV.upper=cbind (diag.mat,offdiag.mat)
VV.lower=cbind (offdiag.mat,diag.mat)
VV=rbind (VV.upper,VV.lower)

XXab=matrix (0,2*m,3)
XXab [,1]=1
XXab [ (m+1) : (2*m) ,2:3]=1

XXba=matrix (0,2*m,3)
XXba [,1]=1
XXba [1:m,3]=1
XXba [ (m+1) : (2*m) ,2]=1

XVXab=t (XXab) %*%solve (VV) %*%XXab
XVXba=t (XXba) %*%solve (VV) %*%XXba

var.beta=solve (0.5*k* (XVXab+XVXba) )

```

```
var[ii]=var.beta[3,3]
}

power=pnorm(ES/sqrt(var)-qnorm(1-alpha/2))
plot(m.vec,power,ylim=c(0,1),type="l")
cbind(m.vec,power)
```
